# Supplementary material for: Development of a superhydrophobic polybenzoxazine surface with self-cleaning and reversible water adhesion properties
Source: Royal Society of Chemistry journal article supplement (doi:10.1039/c6ra22524a), 2016-01-01
Supplement: c6ra22524a1.pdf [file c6ra22524a1.pdf]

# Development of Superhydrophobic Polybenzoxazine Surface with Self-cleaning and Reversible Water Adhesion Properties

Wenfei Zhang, Xin Lu, Zhong Xin\* and Changlu Zhou

Shanghai Key Laboratory of Multiphase Materials Chemical Engineering, State Key Laboratory of Chemical Engineering, School of Chemical Engineering, East China University of Science and Technology, 130 Meilong Road, Xuhui District, Shanghai 200237, China

## SUPPORTING INFORMATION

**Scheme S1.** Synthetic procedures of P-da and P-am monomers and polymers.

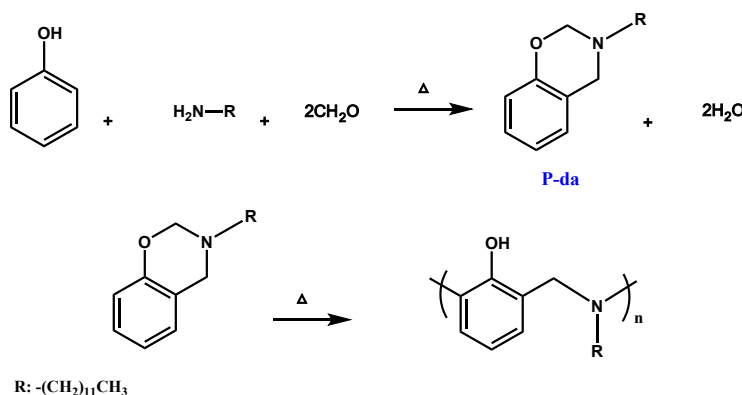

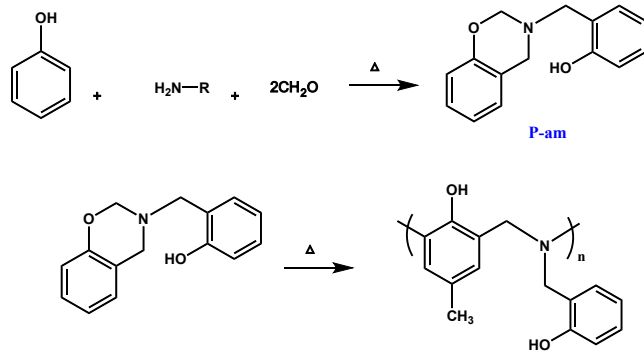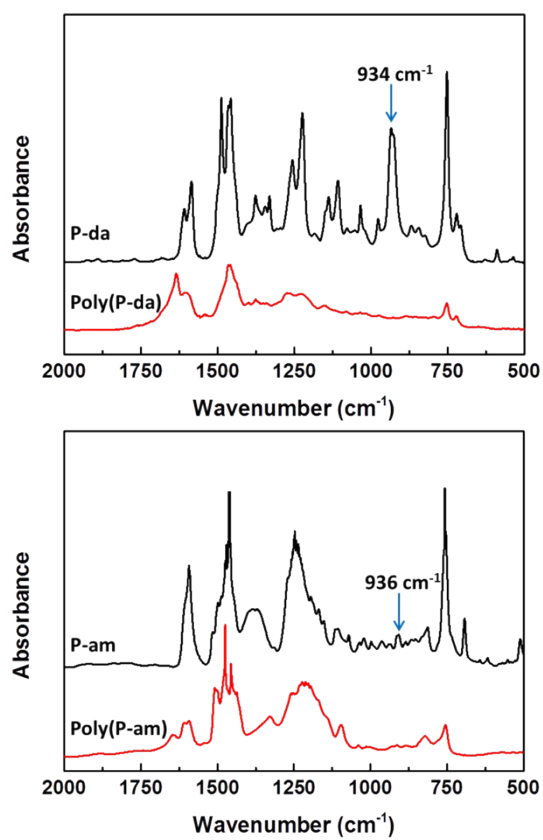

**Figure S1.** FT-IR spectra of P-da and P-am monomers and polymers.

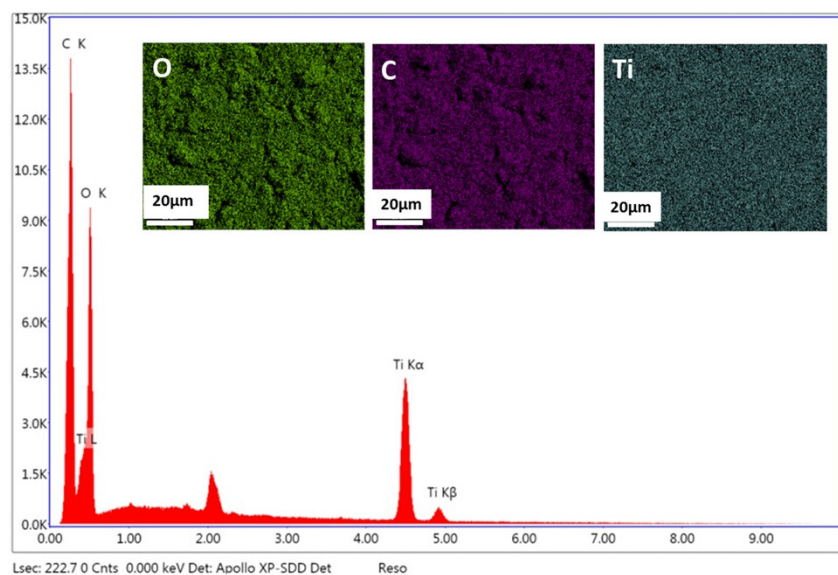

**Figure S2.** EDS spectrum. The insets images are mapping images of O, C and Ti on PPdaT80 surface.

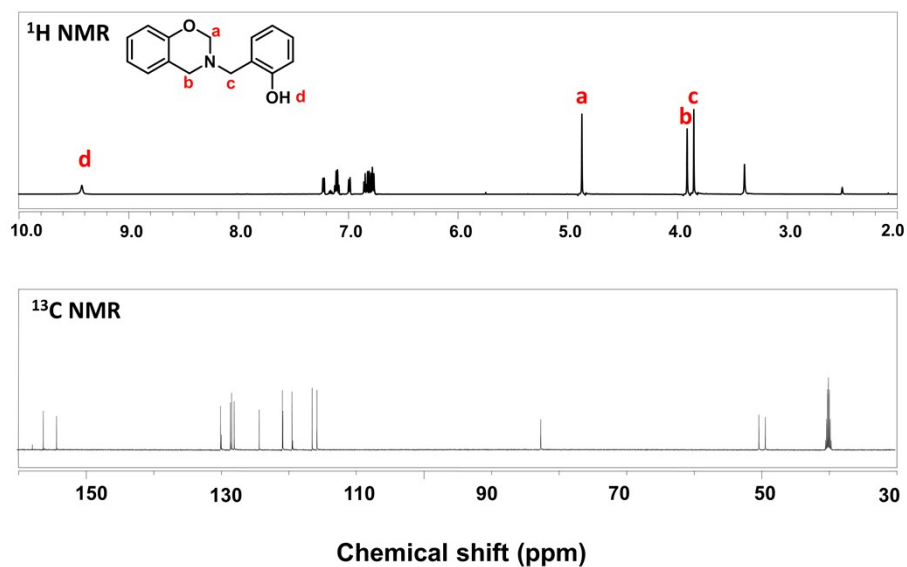

**Figure S3.** <sup>1</sup>H and <sup>13</sup>C NMR spectra of P-am in DMSO-*d*<sub>6</sub>.

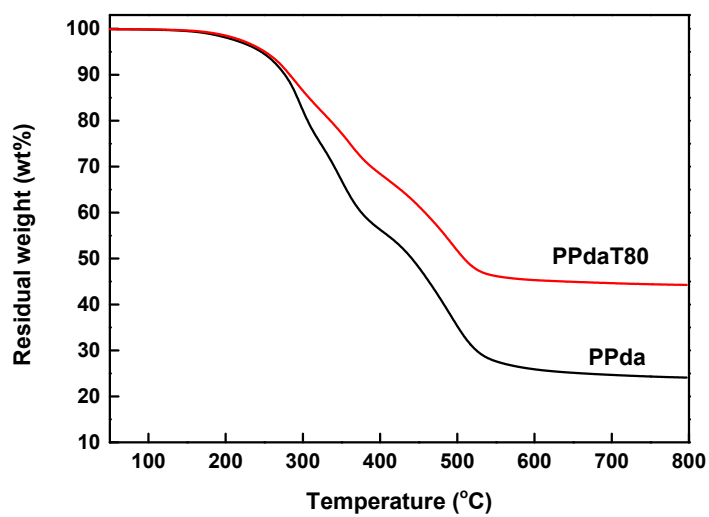

**Figure S4.** TGA thermograms of PPda and PPdaT80. The monomer and composite were polymerized at 200 °C for 1h, respectively.

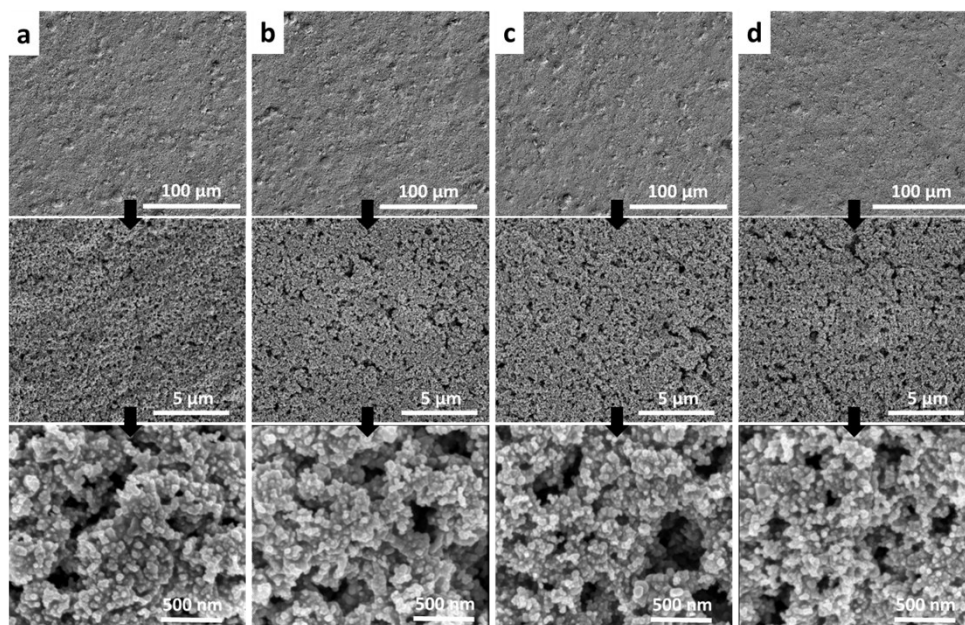

**Figure S5.** SEM images of PPdaT80 surface (a) before and after UV exposure for (b) 1 h, (c) 5 h and (d) 9 h at low and high magnifications.

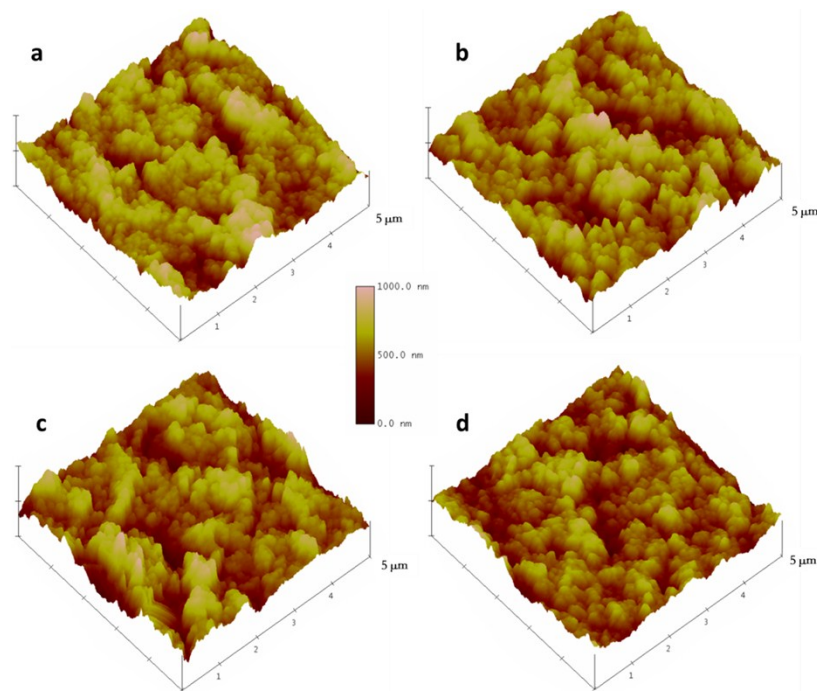

**Figure S6.** AFM images of PPdaT80 surface (a) before and after UV exposure for (b) 1 h, (c) 5 h and (d) 9 h at low and high magnifications.

**Table S1.** Static WCA and WSA of PPamT80 before and after 5-hour UV exposure or heat treatment at 100 °C for 30min.

| Sample  | Condition            | Static WCA (degree) | WSA (degree) |
|---------|----------------------|---------------------|--------------|
| PPamT80 | Before UV exposure   | $\sim 155 \pm 1$    | -            |
|         | After UV exposure    | $\sim 101 \pm 3$    | -            |
|         | After heat treatment | $\sim 148 \pm 1$    | -            |

**Video S1.** Self-cleaning performance of PPdaT80 surface.
